# Supplementary material
Source: Elsevier journal article supplement (https://www.sciencedirect.com/science/article/pii/S0214460320300656)
Supplement: mmc1 [file S0214460320300656:mmc1.docx]

**Alteraciones en el discurso narrativo en hijos de madres con preeclampsia**

[Alterations in the narrative discourse in children born to mothers who had preeclampsia]

Jesenia Acurio1‡; Yesenia Torres1‡; Gemita Manríquez2; Patricio Bertoglia2; José Leon1; Kurt Herltiz1; Carlos Escudero1, 3,4*.

1 Laboratorio de Fisiología Vascular, Universidad del Bio Bio, Chillan, Chile.

2 Servicio de Ginecología y Obstetricia, Hospital Clínico Herminda Martin, Chillan, Chile.

3 Departamento de Ciencias Básicas, Universidad del Bio Bio, Chillan, Chile.

4 Grupo de Investigación e Innovación en Salud Vascular (GRIVAS Health), Chillán, Chile.

Tablas suplementarias

Tabla S1. Datos clínicos de la madre

|  | Normotensas | |  | Preeclámpticas | |
| --- | --- | --- | --- | --- | --- |
|  | Media | SEM |  | Media | SEM |
| Edad en años | 24.5 | 1.9 |  | 22.5 | 2.6 |
| IMC1, kg/m2 | 27.0 | 0.8 |  | 26.3 | 1.4 |
| IMC2, kg/m2 | 32.5 | 0.7 |  | 33.3 | 1.5 |
| PAS, mmHg | 115.6 | 3.7 |  | 146.1* | 2.5 |
| PAD, mmHg | 68.4 | 2.7 |  | 90.9* | 2.8 |
| Proteinuria, mg × 24 h | – |  |  | 460.0 | 60 |

IMC, Índice de masa corporal. PAS, Presión arterial sistólica. PAD, Presión arterial diastólica

Tabla S2: Componentes del lenguaje y sus habilidades*

| **Componentes del lenguaje y sus habilidades** | | | |
| --- | --- | --- | --- |
| **Fonético /Fonológico** | **Morfosintaxis** | **Léxico/Semántico** | **Pragmática** |
| Análisis de las características físicas de los sonidos, estructura, distribución y secuencia de los sonidos del habla | Análisis de la forma o estructura interna de las palabras y las oraciones. Especifica combinaciones de palabras que pueden considerarse aceptables o gramaticales y cuales no. | Relaciones de unos significados con otros y los cambios de significado que experimentan las palabras. | Reglas relacionadas con el uso del lenguaje en un conjunto comunicativo. |
| Repertorio fonético (sonidos del habla) | Desarrollo del morfema plural | Desarrollo léxico (comprensivo y expresivo) | Facultades conversacionales (inicio, mantención y finalización de tema) |
| Estructura silábica | Desarrollo del gerundio | Relaciones semánticas de tiempo y lugar | Peticiones y aclaraciones |
| Longitud de la sílaba | Desarrollo de aumentativos y diminutivos | Definiciones | Presuposición |
| Conciencia Metafonológica | Desarrollo de morfemas de género | Comprensión de absurdos verbales | Deixis |
| Discriminación auditiva | Comprensión de voz pasiva | Conciencia semántico/léxica | Elipsis |
| Memoria auditiva | Longitud Media de los Enunciados | Tareas de etiquetado | Intención comunicativa |
|  | Estructura de las oraciones (Simple, Compuesta) | Tareas de construcción | Kinésica |
|  | Uso y comprensión de Tiempos verbales | Tareas de agrupación | Proxémica |
|  | Uso y comprensión de sustantivos | Evocación categorial | Narraciones orales. |
|  | Uso y comprensión de adjetivos | Asociación auditiva | Conciencia pragmática |
|  | Uso y comprensión de preposiciones |  | Conciencia discursiva |
|  | Uso y comprensión de artículos |  |  |
|  | Uso y comprensión de pronombres |  |  |
|  | Uso y comprensión de adverbios |  |  |
|  | Uso y comprensión de conjunciones |  |  |
|  | Comprensión de la estructura gramatical |  |  |
|  | Uso y comprensión de oraciones negativas |  |  |
|  | Uso y comprensión de oraciones interrogativas |  |  |
|  | Uso y comprensión de oraciones imperativas |  |  |
|  | Conciencia sintáctica |  |  |

* Modificado de Pérez,P. Salmeron, T. 2006 Desarrollo del lenguaje y la comunicación. Revista Pediatría y atención primaria. Vol 3 (111-125) Madrid. España; Serrano 1990 Desarrollo del lenguaje en el periodo escolar. Rev. Logopedia, foniatría y audiología. Vol 2 (74-82); Owens. 2003. Desarrollo del Lenguaje . Quinta edición, Pearson educación. Madrid
